# Supplementary material for: Non-lithifying microbial ecosystem dissolves peritidal lime sand
Source: PubMed Central journal article supplement (PMC8144198; doi:10.1038/s41467-021-23006-1), 2021-05-24
Supplement: 41467_2021_23006_MOESM3_ESM.pdf [file 41467_2021_23006_MOESM3_ESM.pdf]

### **Description of Additional Supplementary Files**

File Name: Supplementary Data 1.xlsx

Description: Porewater and pond water geochemical data
